# Supplementary material for: Molecular dynamics simulation insight into the temperature dependence and healing mechanism of an intrinsic self-healing polyurethane elastomer
Source: Royal Society of Chemistry journal article supplement (doi:10.1039/d0cp03013a), 2020-01-01
Supplement: d0cp03013a1.pdf [file d0cp03013a1.pdf]

**Supporting Information:**

**Molecular dynamics simulation insight into temperature dependence and healing  
mechanism of an intrinsic self-healing polyurethane elastomer**

Xianling Chen,<sup>a,#</sup> Jing Zhu,<sup>d,#</sup> Yanlong Luo,<sup>\*a,b</sup> Jun Chen,<sup>a</sup> Xiaofeng Ma,<sup>a,b</sup> Danil Bukhvalov,<sup>a,b</sup>

Haobei Liu,<sup>e</sup> Meng Zhang<sup>\*c</sup> and Zhenyang Luo<sup>\*a,b</sup>

<sup>a</sup>College of Science, Nanjing Forestry University, Nanjing 210037, P. R. China

<sup>b</sup>Institute of Polymer Materials, Nanjing Forestry University, Nanjing 210037, P. R. China

<sup>c</sup>Institute of Chemical Industry of Forestry Products, CAF, Nanjing, 210042, P. R. China

<sup>d</sup>Tsinghua Univ, Dept Elect Engn, State Key Lab Power Syst, Beijing 100084, P. R. China

<sup>e</sup>China Building Material Federation, Beijing 100037, P.R. China

Correspondence: [luoyanlong@njfu.edu.cn](mailto:luoyanlong@njfu.edu.cn) (Y.L.); [zhangmeng@icifp.cn](mailto:zhangmeng@icifp.cn) (M.Z.);

[luozhenyang@njfu.edu.cn](mailto:luozhenyang@njfu.edu.cn) (Z.L.)

# Xianling Chen and Jing Zhu equally contributed to this paper.

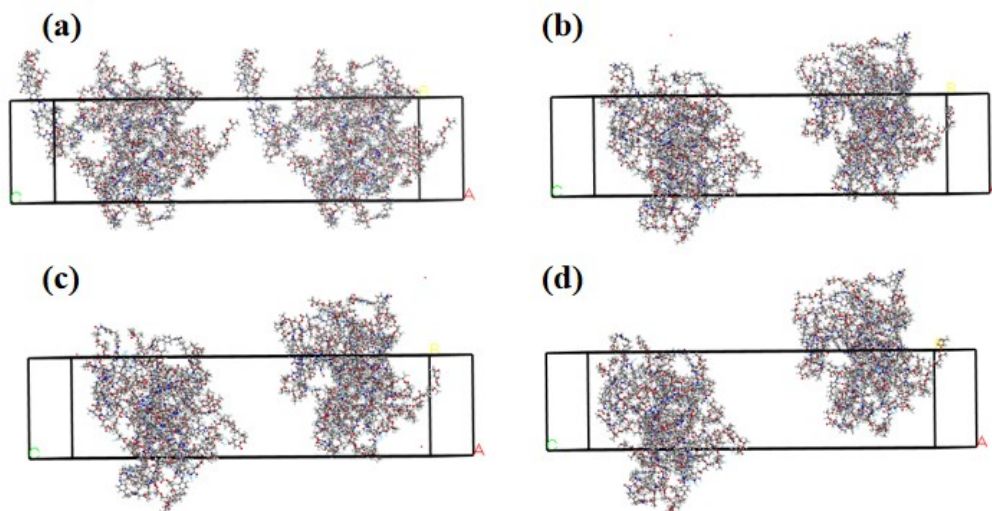

**Figure S1** Motion trajectories of the 10 Å crack of PU3 at (a) 5 ps, (b) 200 ps, (c) 400 ps and (d) 500 ps, respectively, at 25 °C.

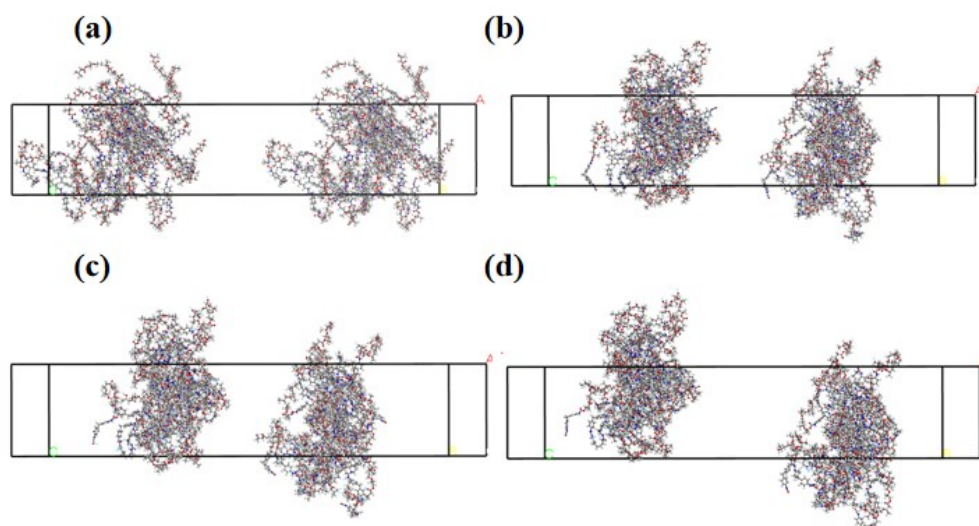

**Figure S2** Motion trajectories of the 30 Å crack of PU3 at (a) 5 ps, (b) 200 ps, (c) 400 ps and (d) 500 ps, respectively, at 25 °C.

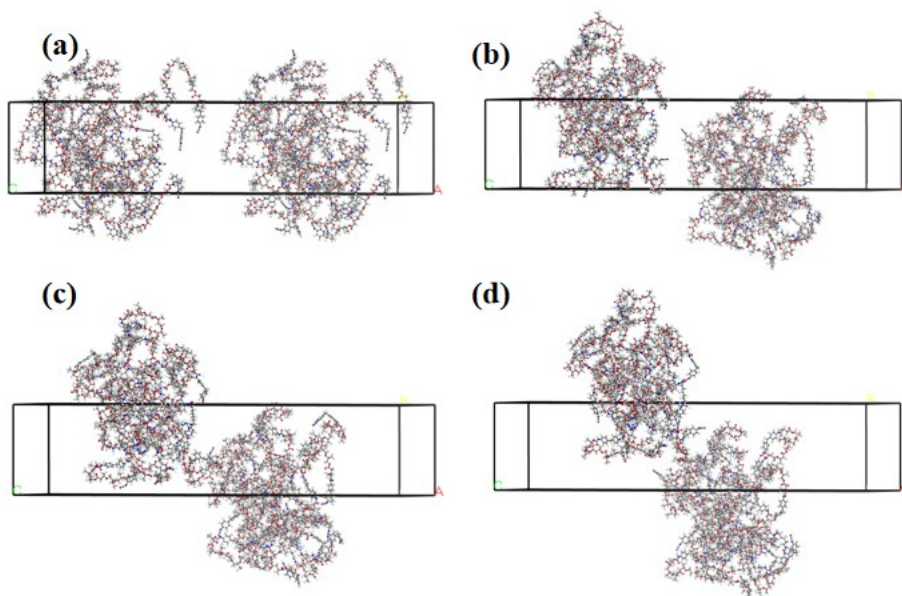

**Figure S3** Motion trajectories of the 10 Å crack of PU2 at (a) 5 ps, (b) 200 ps, (c) 400 ps and (d) 500 ps, respectively, at 25 °C.

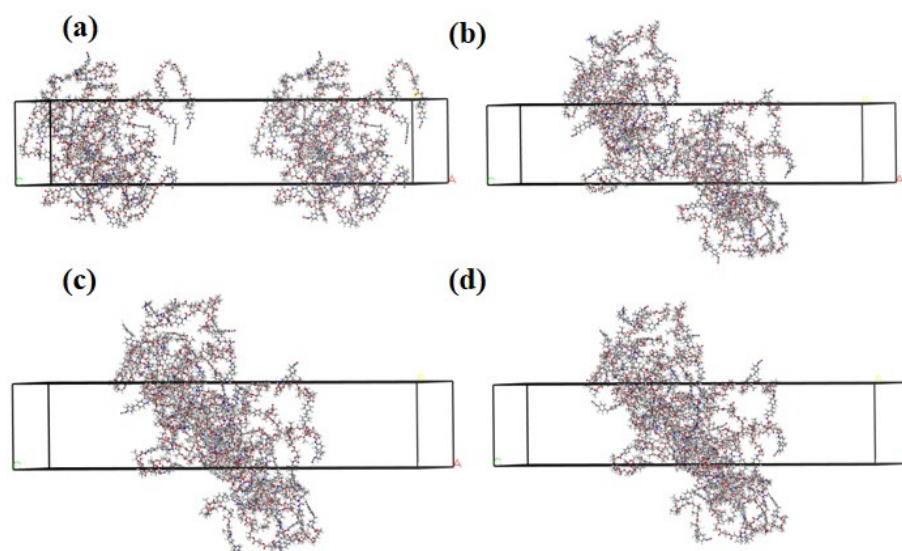

**Figure S4** Motion trajectories of the 30 Å crack of PU2 at (a) 5 ps, (b) 200 ps, (c) 400 ps and (d) 500 ps, respectively, at 25 °C.
